# Supplementary material
Source: HighWire-hosted journal article supplement (https://bmjopen.bmj.com/content/8/7/e024226)
Supplement: inline-supplementary-material-1 [file inline-supplementary-material-1.pdf]

**Appendix 1 – Examples of the stimuli questions that will be used during the semi-structured interviews with participants and healthcare professionals.**

- 
- |                                                                                                                                                                                                                                                                                                                                                                                                                                                                                                                                                                                                                                         |                                                                                                                                                                                                                                                                                                                                                                                                                                                                                                                                                                                                                                                                                                                                                                                                                                                                                                                                                                                                                                                                                                                                                                                                                                                                                                                                                                                                                                                                                                                                                                                                                                                                                                                                                                                                                                                                                                                               |
|-----------------------------------------------------------------------------------------------------------------------------------------------------------------------------------------------------------------------------------------------------------------------------------------------------------------------------------------------------------------------------------------------------------------------------------------------------------------------------------------------------------------------------------------------------------------------------------------------------------------------------------------|-------------------------------------------------------------------------------------------------------------------------------------------------------------------------------------------------------------------------------------------------------------------------------------------------------------------------------------------------------------------------------------------------------------------------------------------------------------------------------------------------------------------------------------------------------------------------------------------------------------------------------------------------------------------------------------------------------------------------------------------------------------------------------------------------------------------------------------------------------------------------------------------------------------------------------------------------------------------------------------------------------------------------------------------------------------------------------------------------------------------------------------------------------------------------------------------------------------------------------------------------------------------------------------------------------------------------------------------------------------------------------------------------------------------------------------------------------------------------------------------------------------------------------------------------------------------------------------------------------------------------------------------------------------------------------------------------------------------------------------------------------------------------------------------------------------------------------------------------------------------------------------------------------------------------------|
| <ul style="list-style-type: none"><li>○ whether the intervention was delivered as intended</li><br/><li>○ the nature of the support and advice provided by the healthcare professionals to the intervention participants</li><br/><li>○ the possible barriers and facilitators to scaling the intervention up in the future</li><br/><li>○ whether people with SCI would value this intervention</li><br/><li>○ whether healthcare service providers could employ and retain staff to provide the intervention</li><br/><li>○ whether the results are generalisable to other patients, healthcare professionals and countries</li></ul> | <ul style="list-style-type: none"><li>○ <i>Intervention participants</i>: describe how often you were rung and visited, whether you were provided with financial support, and the type of help, support and advice you received.</li><li>○ <i>Healthcare professionals</i>: describe how often participants were rung and visited, whether they were provided with financial support, and the type of help, support and advice they received.</li><br/><li>○ <i>Intervention participants</i>: describe the nature of the support and advice you received as part of the CIVIC trial.</li><li>○ <i>Healthcare professionals</i>: describe the nature of the support and advice you provided or others provided as part of the CIVIC trial</li><br/><li>○ <i>Intervention and control participants</i>: describe the barriers and facilitators we may face if we roll this intervention out in the future</li><li>○ <i>Healthcare professionals</i>: describe the barriers and facilitators we may face if we roll this intervention out in the future</li><br/><li>○ <i>Intervention and control participants</i>: discuss whether you valued receiving the intervention, and how much you think your colleagues would value receiving the intervention</li><br/><li>○ <i>Healthcare professionals</i>: discuss any factors that may make it difficult to employ and retain staff to provide this intervention in the future.</li><li>○ <i>Healthcare professionals</i>: discuss why you would like/dislike working as a staff member providing this intervention in the future.</li><br/><li>○ <i>Healthcare professionals</i>: discuss what is unique and what is different between the Centre for Rehabilitation of the Paralysed, its patients, its healthcare professionals and Bangladesh compared to other hospitals, patients, healthcare professionals and low- and middle-income countries, respectively.</li></ul> |
|-----------------------------------------------------------------------------------------------------------------------------------------------------------------------------------------------------------------------------------------------------------------------------------------------------------------------------------------------------------------------------------------------------------------------------------------------------------------------------------------------------------------------------------------------------------------------------------------------------------------------------------------|-------------------------------------------------------------------------------------------------------------------------------------------------------------------------------------------------------------------------------------------------------------------------------------------------------------------------------------------------------------------------------------------------------------------------------------------------------------------------------------------------------------------------------------------------------------------------------------------------------------------------------------------------------------------------------------------------------------------------------------------------------------------------------------------------------------------------------------------------------------------------------------------------------------------------------------------------------------------------------------------------------------------------------------------------------------------------------------------------------------------------------------------------------------------------------------------------------------------------------------------------------------------------------------------------------------------------------------------------------------------------------------------------------------------------------------------------------------------------------------------------------------------------------------------------------------------------------------------------------------------------------------------------------------------------------------------------------------------------------------------------------------------------------------------------------------------------------------------------------------------------------------------------------------------------------|
